# Supplementary material
Source: PubMed Central journal article supplement (PMC2872263)
Supplement: mmc1.pdf [file mmc1.pdf]

Biophysical Journal, Volume 98

**Supporting Material**

**Third-party BRET indicates constitutive association of membrane proteins:  
application to class A GPCRs and G proteins**

Sudhakaranmayi Kuravi, Tien-Hung Lan, Arnab Barik, and Nevin A. Lambert

## Supporting Information

### Third-party BRET indicates constitutive association of membrane proteins: application to class A GPCRs and G proteins

Sudhakaranmayi Kuravi, Tien-Hung Lan, Arnab Barik and Nevin A. Lambert

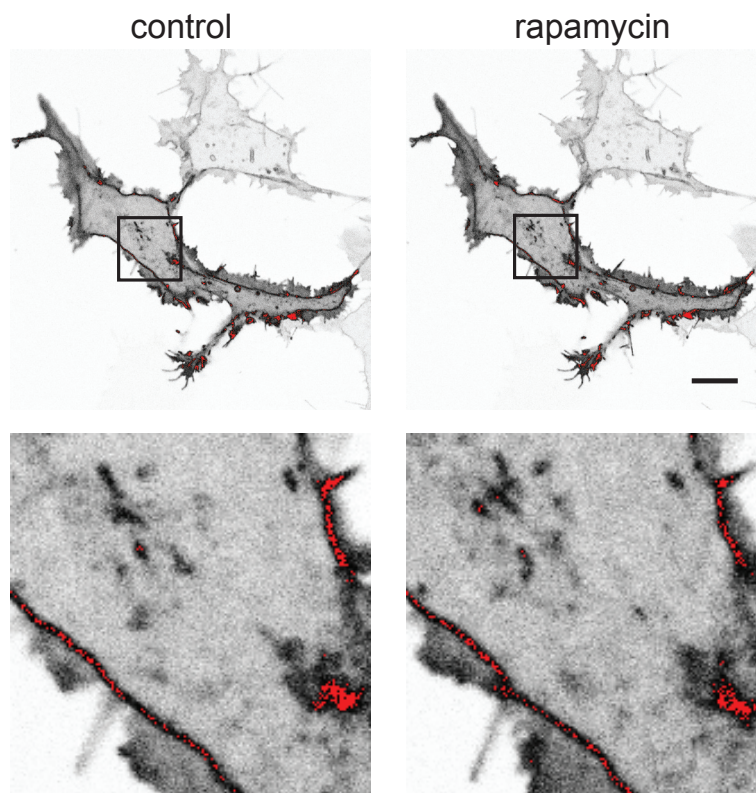

**Figure S1.** Formation of mem-*zip*-Rluc8:mem-*zip*-FRB:mem-l-FKBP-V ternary complexes does not redistribute the third-party acceptor mem-l-FKBP-V. Confocal images of HEK 23 cells before (control) and after (rapamycin) addition of 5  $\mu$ M rapamycin. Squares in the top panels correspond to the expanded regions shown in the bottom panels. Red pixels are intentionally saturated, and the comparable number of saturated pixels at the plasma membrane before and after addition rapamycin indicates that this third-party acceptor was not recruited to this compartment. Calibration bar = 10  $\mu$ m.

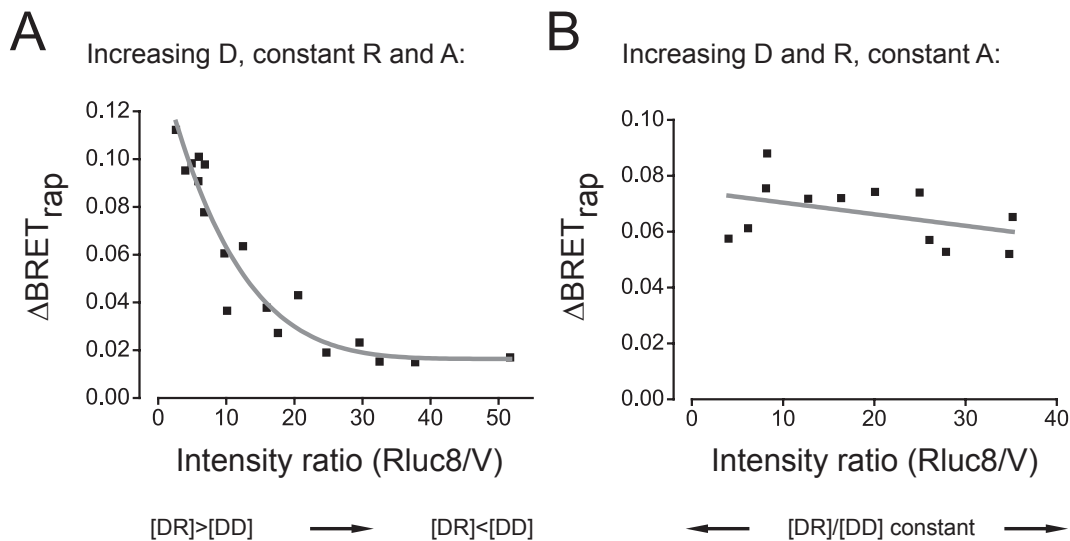

**Figure S2.** Third-party BRET is predictably sensitive to changes in the donor:recruiter ratio, but not to changes in total expression of proteins of interest. (A) Rapamycin-induced BRET ( $\Delta\text{BRET}_{\text{rap}}$ ) is plotted against Rluc8/V intensity in cells expressing an increasing amount of the donor (D) mem-zip-Rluc8 together with a constant amount of the recruiter (R) mem-zip-FRB and acceptor (A) mem-link-FKBP-V. When donors are relatively scarce, most will associate with a recruiter and contribute to  $\Delta\text{BRET}_{\text{rap}}$ . When donors are present in excess, most will associate with each other, and will be unable to contribute to  $\Delta\text{BRET}_{\text{rap}}$ . The smooth line is a least-squares fit to a hyperbolic function. (B)  $\Delta\text{BRET}_{\text{rap}}$  plotted across the same range of Rluc8/V intensity as in A in cells expressing an increasing amount of the donor *and* recruiter, together with a constant amount of the acceptor.  $\Delta\text{BRET}_{\text{rap}}$  was relatively constant across an approximately 10-fold increase in donor expression, suggesting the fraction of donors associated with recruiters remained constant.

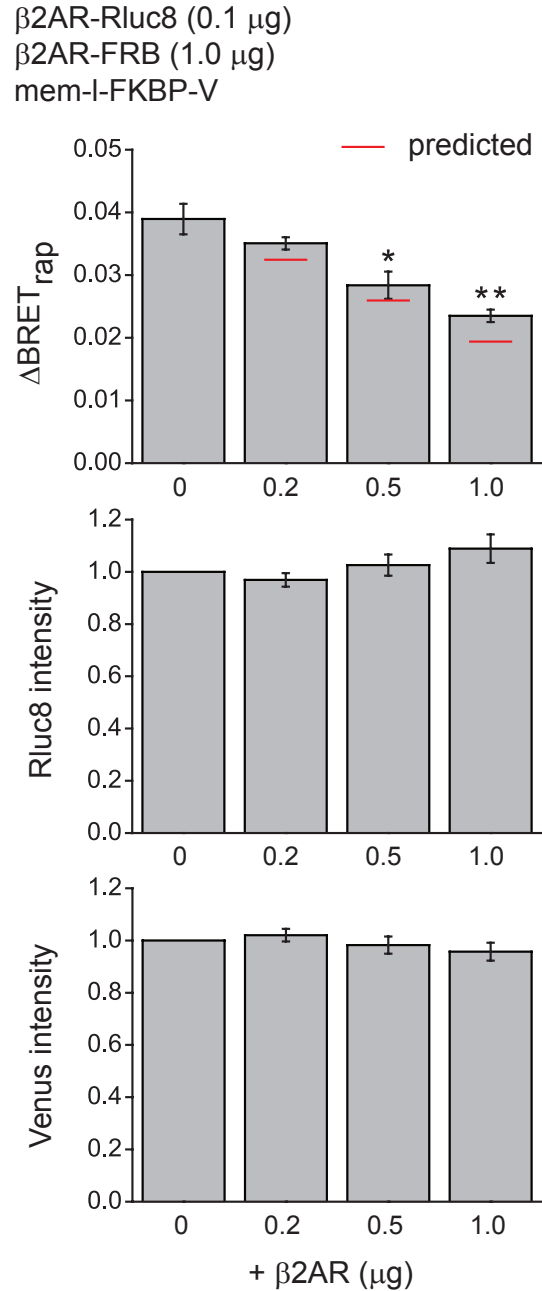

**Figure S3.** Third-party BRET involving  $\beta$ 2AR-Rluc8 and  $\beta$ 2AR-FRB is sensitive to competition from unlabeled  $\beta$ 2AR.  $\Delta$ BRET<sub>rap</sub>,  $\beta$ 2AR-Rluc8 intensity, and venus intensity are plotted against the amount of cotransfected DNA expressing unlabeled  $\beta$ 2AR ( $n=8$ ).  $\Delta$ BRET<sub>rap</sub> decreases as  $\beta$ 2AR expression increases, whereas Rluc8 and venus intensity are unchanged. Horizontal red lines indicate the predicted level of  $\Delta$ BRET<sub>rap</sub> assuming all  $\beta$ 2AR constructs express at levels proportional to the amount of DNA transfected, and all  $\beta$ 2AR proteins associate randomly; \*,  $P<0.05$ ; \*\*,  $P<0.001$ .

**Table S1.** Basal and rapamycin-induced BRET between engineered membrane-associated proteins ( $\pm$  SEM).

| third-party acceptor/donor | recruiter             | donor/acceptor         | BRET <sub>basal</sub> | $\Delta$ BRET <sub>rap</sub> | <i>P</i> | <i>n</i> |
|----------------------------|-----------------------|------------------------|-----------------------|------------------------------|----------|----------|
| mem-I-FKBP-V               | mem- <i>zip</i> -FRB  | mem- <i>zip</i> -Rluc8 | 0.14 $\pm$ 0.02       | 0.07 $\pm$ 0.01              | <0.00003 | 7        |
| mem-I-FKBP-V               | mem- <i>zip</i> -FRB  | mem-I-Rluc8            | 0.06 $\pm$ 0.01       | 0.00 $\pm$ 0.00              | 0.552    | 7        |
| mem-I-FKBP-V               | mem-I-FRB             | mem- <i>zip</i> -Rluc8 | 0.13 $\pm$ 0.01       | 0.01 $\pm$ 0.00              | 0.072    | 8        |
| mem-I-FKBP-V               | mem-I-FRB             | mem-I-Rluc8            | 0.05 $\pm$ 0.00       | 0.00 $\pm$ 0.00              | 0.718    | 4        |
| mem-I-FRB-V                | mem- <i>zip</i> -FKBP | mem- <i>zip</i> -Rluc8 | 0.13 $\pm$ 0.02       | 0.05 $\pm$ 0.00              | <0.00001 | 7        |
| mem-I-FKBP-Rluc8           | mem- <i>zip</i> -FRB  | mem- <i>zip</i> -V     | 0.09 $\pm$ 0.01       | 0.08 $\pm$ 0.01              | <0.00002 | 7        |

**Table S2.** Basal and rapamycin-induced BRET between mem-I-FKBP-Rluc8/mem-*zip*-FRB and various membrane protein acceptors ( $\pm$  SEM).

| third-party donor | recruiter            | acceptor                                        | BRET <sub>basal</sub> | $\Delta$ BRET <sub>rap</sub> | <i>P</i> | <i>n</i> |
|-------------------|----------------------|-------------------------------------------------|-----------------------|------------------------------|----------|----------|
| mem-I-FKBP-Rluc8  | mem- <i>zip</i> -FRB | mem- <i>zip</i> -V                              | 0.11 $\pm$ 0.01       | 0.12 $\pm$ 0.01              | <0.0004  | 5        |
|                   |                      | D2R-V                                           | 0.07 $\pm$ 0.01       | -0.01 $\pm$ 0.00             | 0.009    | 5        |
|                   |                      | GIRK1/2-V                                       | 0.02 $\pm$ 0.00       | -0.00 $\pm$ 0.00             | 0.129    | 5        |
|                   |                      | C-TM-V                                          | 0.05 $\pm$ 0.00       | -0.01 $\pm$ 0.00             | 0.015    | 5        |
|                   |                      | masGRKct-V                                      | 0.14 $\pm$ 0.01       | -0.03 $\pm$ 0.01             | 0.002    | 5        |
|                   |                      | caveolin1-V                                     | 0.02 $\pm$ 0.00       | -0.01 $\pm$ 0.00             | 0.011    | 5        |
|                   |                      | G $\beta$ <sub>1</sub> $\gamma$ <sub>2</sub> -V | 0.02 $\pm$ 0.00       | -0.01 $\pm$ 0.00             | 0.025    | 5        |
|                   |                      | G $\alpha$ <sub>oA</sub> -V                     | 0.04 $\pm$ 0.00       | -0.00 $\pm$ 0.00             | 0.042    | 5        |
| V- <i>kras</i>    | 0.18 $\pm$ 0.01      | -0.01 $\pm$ 0.01                                | 0.099                 | 5                            |          |          |

**Table S3.** Basal and rapamycin-induced BRET between mem-I-FKBP-V/ $\beta$ 2AR-FRB and various membrane protein acceptors ( $\pm$  SEM).

| third-party acceptor | recruiter       | donor              | BRET <sub>basal</sub> | $\Delta$ BRET <sub>rap</sub> | <i>P</i> | <i>n</i> |
|----------------------|-----------------|--------------------|-----------------------|------------------------------|----------|----------|
| mem-I-FKBP-V         | $\beta$ 2AR-FRB | $\beta$ 2AR-Rluc8  | 0.22 $\pm$ 0.02       | 0.05 $\pm$ 0.01              | 0.001    | 5        |
|                      |                 | mem-I-Rluc8        | 0.13 $\pm$ 0.02       | 0.00 $\pm$ 0.00              | 0.103    | 5        |
|                      |                 | Rluc8- <i>kras</i> | 0.12 $\pm$ 0.01       | 0.00 $\pm$ 0.00              | 0.683    | 4        |
|                      |                 | Rluc8-PH           | 0.16 $\pm$ 0.02       | -0.00 $\pm$ 0.00             | 0.603    | 5        |
|                      |                 | masGRKct-Rluc8     | 0.20 $\pm$ 0.02       | -0.01 $\pm$ 0.00             | 0.236    | 5        |

**Table S4.** Basal and rapamycin-induced BRET between mem-I-FKBP-V/ $\beta$ 2AR-FRB and various class A GPCRs ( $\pm$  SEM).

| third-party acceptor | recruiter       | donor              | BRET <sub>basal</sub> | $\Delta$ BRET <sub>rap</sub> | <i>P</i> | <i>n</i> |
|----------------------|-----------------|--------------------|-----------------------|------------------------------|----------|----------|
| mem-I-FKBP-V         | $\beta$ 2AR-FRB | $\beta$ 2AR-Rluc8  | 0.18 $\pm$ 0.01       | 0.04 $\pm$ 0.00              | <0.0001  | 10       |
|                      |                 | D1R-Rluc8          | 0.19 $\pm$ 0.00       | 0.01 $\pm$ 0.00              | <0.0001  | 5        |
|                      |                 | D2R-Rluc8          | 0.14 $\pm$ 0.01       | -0.00 $\pm$ 0.00             | 0.650    | 5        |
|                      |                 | $\alpha$ 2AR-Rluc8 | 0.14 $\pm$ 0.01       | 0.01 $\pm$ 0.00              | <0.0001  | 5        |
|                      |                 | M3R-Rluc8          | 0.27 $\pm$ 0.01       | -0.03 $\pm$ 0.00             | 0.0002   | 5        |
|                      |                 | M4R-Rluc8          | 0.14 $\pm$ 0.00       | -0.02 $\pm$ 0.00             | <0.0001  | 5        |
|                      |                 | MOR-Rluc8          | 0.01 $\pm$ 0.00       | 0.02 $\pm$ 0.00              | <0.0001  | 5        |
|                      |                 | CB1R-Rluc8         | 0.08 $\pm$ 0.00       | 0.02 $\pm$ 0.00              | 0.0003   | 5        |
|                      |                 | mem-I-Rluc8        | 0.07 $\pm$ 0.00       | 0.00 $\pm$ 0.00              | 0.330    | 5        |

**Table S5.** Basal and rapamycin-induced BRET between mem-I-FKBP-Rluc8/FRB-G $\beta$ <sub>1</sub> $\gamma$ <sub>2</sub> and various acceptors ( $\pm$  SEM).

| third-party donor | recruiter                                                                     | acceptor                    | BRET <sub>basal</sub> | $\Delta$ BRET <sub>rap</sub> | <i>P</i> | <i>n</i> |
|-------------------|-------------------------------------------------------------------------------|-----------------------------|-----------------------|------------------------------|----------|----------|
| mem-I-FKBP-Rluc8  | FRB-G $\gamma$ <sub>2</sub> +G $\beta$ <sub>1</sub>                           | G $\alpha$ <sub>oA</sub> -V | 0.02 $\pm$ 0.00       | 0.05 $\pm$ 0.00              | 0.001    | 4        |
|                   | FRB-G $\gamma$ <sub>2</sub> +G $\beta$ <sub>1</sub>                           | masGRKct-V                  | 0.05 $\pm$ 0.00       | 0.03 $\pm$ 0.00              | <0.0006  | 4        |
|                   | FRB-G $\gamma$ <sub>2</sub> +G $\beta$ <sub>1</sub>                           | V-GIRK1+GIRK2               | 0.00 $\pm$ 0.00       | 0.01 $\pm$ 0.00              | <0.0001  | 3        |
|                   | FRB-G $\gamma$ <sub>2</sub> +G $\beta$ <sub>1</sub> +G $\alpha$ <sub>i1</sub> | $\alpha$ 2AR-V              | 0.04 $\pm$ 0.01       | -0.01 $\pm$ 0.00             | 0.014    | 4        |
|                   | FRB-G $\gamma$ <sub>2</sub> +G $\beta$ <sub>1</sub> +G $\alpha$ <sub>i1</sub> | mem- <i>zip</i> -V          | 0.07 $\pm$ 0.01       | -0.01 $\pm$ 0.00             | 0.003    | 4        |
|                   | FRB-G $\gamma$ <sub>2</sub> +G $\beta$ <sub>1</sub> +G $\alpha$ <sub>i1</sub> | V- <i>kras</i>              | 0.11 $\pm$ 0.02       | -0.02 $\pm$ 0.00             | 0.003    | 4        |

**Table S6.** Basal Em535/480 and rapamycin-induced BRET between engineered membrane-associated proteins calculated with propagated errors ( $\pm$  95% confidence).

| third-party acceptor/donor | recruiter    | donor/acceptor | Em535/480 <sub>basal</sub> | Em535/480 <sub>rap</sub> | $\Delta$ BRET <sub>rap</sub> | n |
|----------------------------|--------------|----------------|----------------------------|--------------------------|------------------------------|---|
| mem-l-FKBP-V               | mem-zip-FRB  | mem-zip-Rluc8  | 0.54 $\pm$ 0.01            | 0.61 $\pm$ 0.01          | 0.07 $\pm$ 0.01              | 7 |
| mem-l-FKBP-V               | mem-zip-FRB  | mem-l-Rluc8    | 0.46 $\pm$ 0.00            | 0.46 $\pm$ 0.00          | 0.00 $\pm$ 0.01              | 7 |
| mem-l-FKBP-V               | mem-l-FRB    | mem-zip-Rluc8  | 0.55 $\pm$ 0.01            | 0.56 $\pm$ 0.01          | 0.01 $\pm$ 0.01              | 8 |
| mem-l-FKBP-V               | mem-l-FRB    | mem-l-Rluc8    | 0.45 $\pm$ 0.00            | 0.45 $\pm$ 0.00          | 0.00 $\pm$ 0.01              | 4 |
| mem-l-FRB-V                | mem-zip-FKBP | mem-zip-Rluc8  | 0.56 $\pm$ 0.01            | 0.61 $\pm$ 0.01          | 0.05 $\pm$ 0.01              | 7 |
| mem-l-FKBP-Rluc8           | mem-zip-FRB  | mem-zip-V      | 0.50 $\pm$ 0.01            | 0.59 $\pm$ 0.01          | 0.10 $\pm$ 0.01              | 7 |

**Table S7.** Basal Em535/480 and rapamycin-induced BRET between mem-l-FKBP-Rluc8/mem-zip-FRB and membrane protein acceptors calculated with propagated errors ( $\pm$  95% confidence).

| third-party donor | recruiter       | acceptor                                        | Em535/480 <sub>basal</sub> | Em535/480 <sub>rap</sub> | $\Delta$ BRET <sub>rap</sub> | n |
|-------------------|-----------------|-------------------------------------------------|----------------------------|--------------------------|------------------------------|---|
| mem-l-FKBP-Rluc8  | mem-zip-FRB     | mem-zip-V                                       | 0.51 $\pm$ 0.00            | 0.63 $\pm$ 0.01          | 0.12 $\pm$ 0.01              | 5 |
|                   |                 | D2R-V                                           | 0.47 $\pm$ 0.01            | 0.46 $\pm$ 0.01          | -0.01 $\pm$ 0.02             | 5 |
|                   |                 | GIRK1/2-V                                       | 0.43 $\pm$ 0.01            | 0.43 $\pm$ 0.01          | -0.00 $\pm$ 0.01             | 5 |
|                   |                 | C-TM-V                                          | 0.46 $\pm$ 0.01            | 0.46 $\pm$ 0.01          | -0.01 $\pm$ 0.01             | 5 |
|                   |                 | masGRKct-V                                      | 0.55 $\pm$ 0.01            | 0.52 $\pm$ 0.01          | -0.03 $\pm$ 0.01             | 5 |
|                   |                 | caveolin1-V                                     | 0.43 $\pm$ 0.01            | 0.42 $\pm$ 0.01          | -0.01 $\pm$ 0.01             | 5 |
|                   |                 | G $\beta$ <sub>1</sub> $\gamma$ <sub>2</sub> -V | 0.43 $\pm$ 0.01            | 0.42 $\pm$ 0.01          | -0.00 $\pm$ 0.01             | 5 |
|                   |                 | G $\alpha$ <sub>A</sub> -V                      | 0.44 $\pm$ 0.00            | 0.44 $\pm$ 0.00          | -0.00 $\pm$ 0.01             | 5 |
| V-kras            | 0.60 $\pm$ 0.02 | 0.57 $\pm$ 0.01                                 | -0.03 $\pm$ 0.02           | 5                        |                              |   |

**Table S8.** Basal Em535/480 and rapamycin-induced BRET between mem-l-FKBP-V/ $\beta$ 2AR-FRB and membrane protein acceptors calculated with propagated errors ( $\pm$  95% confidence).

| third-party acceptor | recruiter       | donor             | Em535/480 <sub>basal</sub> | Em535/480 <sub>rap</sub> | $\Delta$ BRET <sub>rap</sub> | n |
|----------------------|-----------------|-------------------|----------------------------|--------------------------|------------------------------|---|
| mem-l-FKBP-V         | $\beta$ 2AR-FRB | $\beta$ 2AR-Rluc8 | 0.60 $\pm$ 0.01            | 0.65 $\pm$ 0.01          | 0.05 $\pm$ 0.01              | 5 |
|                      |                 | mem-l-Rluc8       | 0.52 $\pm$ 0.00            | 0.52 $\pm$ 0.00          | 0.00 $\pm$ 0.01              | 5 |
|                      |                 | Rluc8-kras        | 0.65 $\pm$ 0.00            | 0.65 $\pm$ 0.01          | 0.00 $\pm$ 0.01              | 4 |
|                      |                 | Rluc8-PH          | 0.56 $\pm$ 0.00            | 0.55 $\pm$ 0.00          | -0.00 $\pm$ 0.00             | 5 |
|                      |                 | masGRKct-Rluc8    | 0.58 $\pm$ 0.00            | 0.58 $\pm$ 0.00          | -0.01 $\pm$ 0.01             | 5 |

**Table S9.** Basal Em535/480 and rapamycin-induced BRET between mem-l-FKBP-V/ $\beta$ 2AR-FRB and various class A GPCRs calculated with propagated errors ( $\pm$  95% confidence).

| third-party acceptor | recruiter       | donor              | Em535/480 <sub>basal</sub> | Em535/480 <sub>rap</sub> | $\Delta$ BRET <sub>rap</sub> | n  |
|----------------------|-----------------|--------------------|----------------------------|--------------------------|------------------------------|----|
| mem-l-FKBP-V         | $\beta$ 2AR-FRB | $\beta$ 2AR-Rluc8  | 0.58 $\pm$ 0.01            | 0.62 $\pm$ 0.01          | 0.04 $\pm$ 0.01              | 10 |
|                      |                 | D1R-Rluc8          | 0.59 $\pm$ 0.00            | 0.60 $\pm$ 0.00          | 0.01 $\pm$ 0.01              | 5  |
|                      |                 | D2R-Rluc8          | 0.55 $\pm$ 0.01            | 0.55 $\pm$ 0.01          | 0.00 $\pm$ 0.01              | 5  |
|                      |                 | $\alpha$ 2AR-Rluc8 | 0.54 $\pm$ 0.01            | 0.56 $\pm$ 0.01          | 0.01 $\pm$ 0.01              | 5  |
|                      |                 | M3R-Rluc8          | 0.67 $\pm$ 0.01            | 0.64 $\pm$ 0.01          | -0.03 $\pm$ 0.02             | 5  |
|                      |                 | M4R-Rluc8          | 0.54 $\pm$ 0.01            | 0.52 $\pm$ 0.01          | -0.02 $\pm$ 0.01             | 5  |
|                      |                 | MOR-Rluc8          | 0.41 $\pm$ 0.01            | 0.43 $\pm$ 0.01          | 0.02 $\pm$ 0.01              | 5  |
|                      |                 | CB1R-Rluc8         | 0.49 $\pm$ 0.02            | 0.50 $\pm$ 0.01          | 0.02 $\pm$ 0.02              | 5  |
|                      |                 | mem-l-Rluc8        | 0.47 $\pm$ 0.00            | 0.47 $\pm$ 0.00          | 0.00 $\pm$ 0.01              | 5  |

**Table S10.** Basal Em535/480 and rapamycin-induced BRET between mem-l-FKBP-Rluc8/FRB-G $\beta$ <sub>1</sub> $\gamma$ <sub>2</sub> and acceptors calculated with propagated errors ( $\pm$  95% confidence).

| third-party donor | recruiter                                           | acceptor                   | Em535/480 <sub>basal</sub> | Em535/480 <sub>rap</sub> | $\Delta$ BRET <sub>rap</sub> | n |
|-------------------|-----------------------------------------------------|----------------------------|----------------------------|--------------------------|------------------------------|---|
| mem-l-FKBP-Rluc8  | FRB-G $\gamma$ <sub>2</sub> +G $\beta$ <sub>1</sub> | G $\alpha$ <sub>A</sub> -V | 0.42 $\pm$ 0.00            | 0.47 $\pm$ 0.00          | 0.05 $\pm$ 0.01              | 4 |
|                   |                                                     | masGRKct-V                 | 0.45 $\pm$ 0.01            | 0.48 $\pm$ 0.01          | 0.03 $\pm$ 0.01              | 4 |
|                   |                                                     | V-GIRK1+GIRK2              | 0.40 $\pm$ 0.01            | 0.41 $\pm$ 0.01          | 0.01 $\pm$ 0.01              | 3 |
|                   |                                                     | $\alpha$ 2AR-V             | 0.44 $\pm$ 0.01            | 0.43 $\pm$ 0.01          | -0.01 $\pm$ 0.01             | 4 |
|                   |                                                     | mem-zip-V                  | 0.47 $\pm$ 0.00            | 0.46 $\pm$ 0.00          | -0.01 $\pm$ 0.01             | 4 |
|                   |                                                     | V-kras                     | 0.51 $\pm$ 0.01            | 0.49 $\pm$ 0.01          | -0.02 $\pm$ 0.01             | 4 |

**Table S11.** Rapamycin-induced BRET between GPCRs and G proteins calculated with propagated errors ( $\pm$  95% confidence).

| GPCR               | control          | +agonist         | GXP-depleted     | depleted+agonist | +GTP $\gamma$ S  | <i>n</i> |
|--------------------|------------------|------------------|------------------|------------------|------------------|----------|
| $\alpha$ 2AR-V     | -0.01 $\pm$ 0.01 | 0.00 $\pm$ 0.01  | -0.01 $\pm$ 0.01 | 0.05 $\pm$ 0.01  | -0.01 $\pm$ 0.01 | 5        |
| $\alpha$ 2AR-Rluc8 | -0.01 $\pm$ 0.01 | 0.01 $\pm$ 0.01  | -0.01 $\pm$ 0.01 | 0.04 $\pm$ 0.01  | 0.01 $\pm$ 0.01  | 4        |
| $\alpha$ 2AR-FRB   | -0.00 $\pm$ 0.01 | 0.01 $\pm$ 0.01  | -0.01 $\pm$ 0.01 | 0.02 $\pm$ 0.01  | 0.01 $\pm$ 0.01  | 4        |
| D2R-Rluc8          | -0.02 $\pm$ 0.01 | -0.00 $\pm$ 0.01 | -0.02 $\pm$ 0.01 | 0.01 $\pm$ 0.01  | -0.01 $\pm$ 0.02 | 3        |
| M4R-Rluc8          | -0.03 $\pm$ 0.01 | 0.01 $\pm$ 0.01  | -0.04 $\pm$ 0.01 | 0.02 $\pm$ 0.01  | -0.03 $\pm$ 0.02 | 3        |
| CB1R-Rluc8         | 0.00 $\pm$ 0.03  | 0.03 $\pm$ 0.03  | 0.02 $\pm$ 0.02  | 0.06 $\pm$ 0.03  | 0.02 $\pm$ 0.04  | 3        |

**Table S12.** Agonist-induced BRET between GPCRs and G proteins calculated with propagated errors ( $\pm$  95% confidence).

| GPCRs                    | UK 14,304        | carbachol        | UK 14,304+carbachol | <i>n</i> |
|--------------------------|------------------|------------------|---------------------|----------|
| $\alpha$ 2AR-Rluc8 + M4R | 0.01 $\pm$ 0.01  | -0.00 $\pm$ 0.01 | 0.00 $\pm$ 0.01     | 8        |
| $\alpha$ 2AR + M4R-Rluc8 | -0.00 $\pm$ 0.01 | 0.02 $\pm$ 0.01  | 0.00 $\pm$ 0.01     | 8        |
